# Supplementary material for: Combined QM (MS-CASPT2)/MM studies on photocyclization and photoisomerization of a fulgide derivative in toluene solution
Source: Royal Society of Chemistry journal article supplement (doi:10.1039/d2cp03807b), 2022-01-01
Supplement: d2cp03807b1.pdf [file d2cp03807b1.pdf]

## **Electronic Supporting Information: Combined QM(MS-CASPT2)/MM Studies on Photocyclization and Photoisomerization of a Fulgide Derivative in Toluene Solution**

Ling-Ya Peng,<sup>a</sup> Zi-Wen Li,<sup>a</sup> Qiu Fang,<sup>a</sup> Bin-Bin Xie,<sup>\*b</sup> Shu-Hua Xia,<sup>\*c</sup> Ganglong Cui<sup>a</sup>

<sup>a</sup> Key Laboratory of Theoretical and Computational Photochemistry, Ministry of Education, College of Chemistry, Beijing Normal University, Beijing 100875, China.

<sup>b</sup> Hangzhou Institute of Advanced Studies, Zhejiang Normal University, Hangzhou 311231, Zhejiang, China. E-mail: [binbinxie@zjnu.edu.cn](mailto:binbinxie@zjnu.edu.cn)

<sup>c</sup> College of Life and Environmental Sciences, Minzu University of China, Beijing 100081, China.

E-mail: [shuhua\\_xia@muc.edu.cn](mailto:shuhua_xia@muc.edu.cn)

### Table of Contents

- 1. Two Equilibrium Conformers of the E-isomer**
- 2. The Choice of Active Spaces of E, Z, and C Isomers of a Fulgide Derivative**
- 3. Relative Energies of the Optimized E, Z, and C Isomers in the S<sub>1</sub> State**
- 4. Cartesian Coordinates for Critical Structures**

## 1. Two equilibrium conformers of the E-isomer

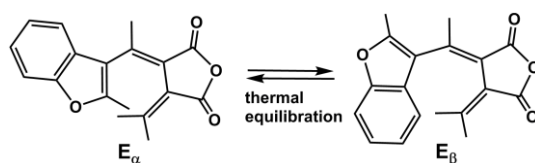

**Figure S1.** Two equilibrium conformers of the E-isomer ( $E_\alpha$  and  $E_\beta$ ).

## 2. The Choice of Active Spaces of E, Z and C Isomers of a Fulgide Derivative

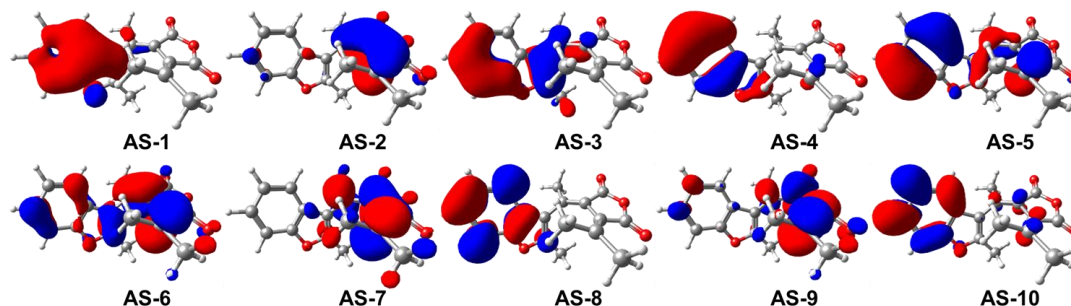

**Figure S2.** Molecular orbitals of E used as the active space in the CASSCF (12,10) optimizations.

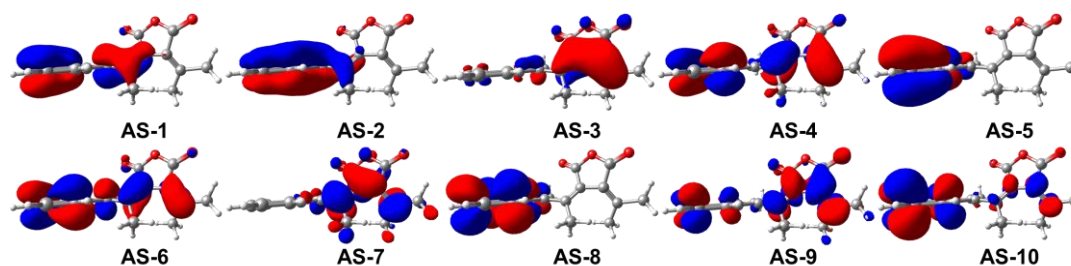

**Figure S3.** Molecular orbitals of Z used as the active space in the CASSCF (12,10) optimizations.

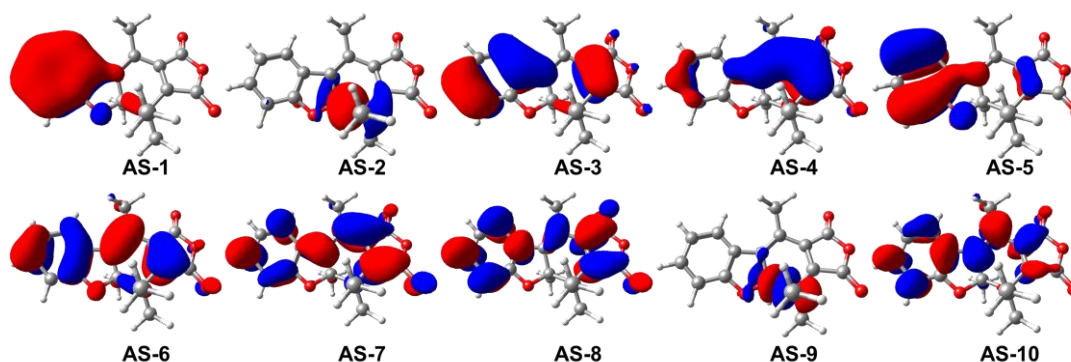

**Figure S4.** Molecular orbitals of C used as the active space in the CASSCF (12,10) optimizations.

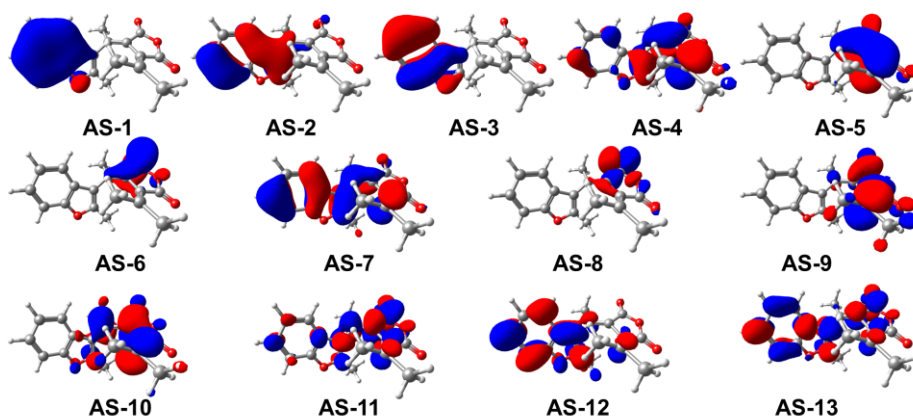

**Figure S5.** Molecular orbitals of E used as the active space in the MS-CASPT2 (16,13) refinements.

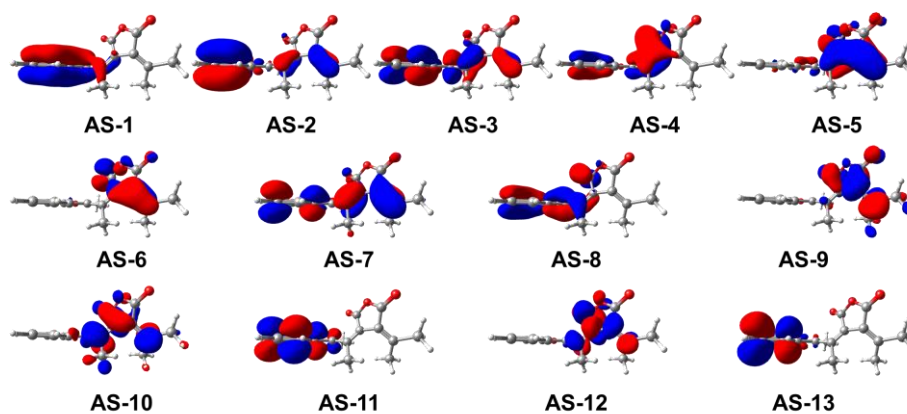

**Figure S6.** Molecular orbitals of Z used as the active space in the MS-CASPT2 (16,13) refinements.

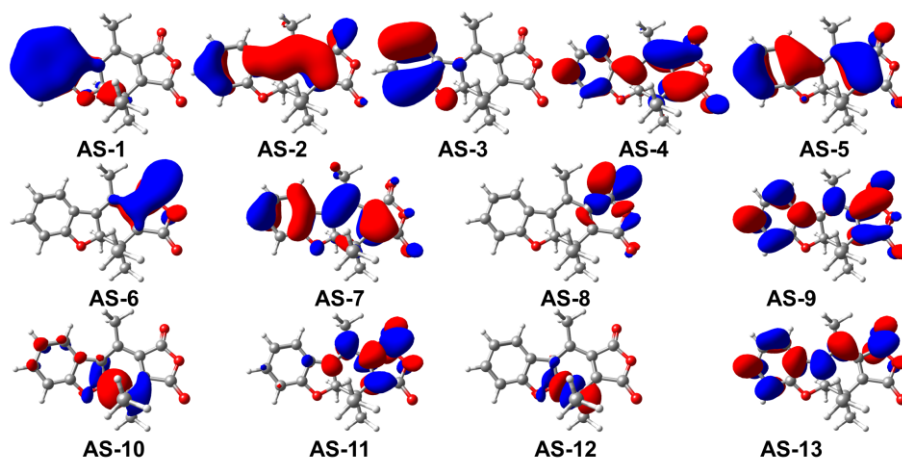

**Figure S7.** Molecular orbitals of C used as the active space in the MS-CASPT2 (16,13) refinements.

### 3. Relative Energies of the Optimized E, Z, and C Isomers in the S<sub>1</sub> State

**Table S1.** Relative energies of E, Z and C isomers in the S<sub>0</sub> and S<sub>1</sub> states using different basis sets relative to the corresponding S<sub>0</sub> minimum of C (unit: kcal/mol).

| structures      | environment          | 6-31G*/6-311G**/6-311++G**/def2-TZVP |                        |
|-----------------|----------------------|--------------------------------------|------------------------|
|                 |                      | S <sub>0</sub>                       | S <sub>1</sub>         |
| <b>C-isomer</b> | MS-CASPT2(12,10)     | 0.0/0.0/0.0/0.0                      | 55.3/48.1/46.7/44.8    |
|                 | MS-CASPT2(12,10)/PCM | 0.0/0.0/0.0/0.0                      | 52.6/45.8/43.8/42.7    |
|                 | MS-CASPT2(12,10)/MM  | 0.0/0.0/0.0/0.0                      | 61.1/69.4/65.4/66.1    |
| <b>E-isomer</b> | MS-CASPT2(12,10)     | 15.6/18.4/16.5/15.0                  | 64.8/64.1/62.6/60.8    |
|                 | MS-CASPT2(12,10)/PCM | 14.3/16.8/15.0/14.0                  | 65.2/61.7/60.1/58.8    |
|                 | MS-CASPT2(12,10)/MM  | 40.0/41.7/41.0/39.7                  | 84.5/83.8/82.4/80.8    |
| <b>Z-isomer</b> | MS-CASPT2(12,10)     | 18.7/19.9/19.9/17.6                  | 94.7/94.8/92.8/90.0    |
|                 | MS-CASPT2(12,10)/PCM | 16.6/24.8/17.4/22.7                  | 95.2/94.6/86.2/90.4    |
|                 | MS-CASPT2(12,10)/MM  | 27.9/30.8/31.0/28.0                  | 101.0/103.4/104.5/97.9 |

For comparison, the triple-zeta basis sets of 6-311G\*\*, 6-311++G\*\* and def2-TZVP have been employed to evaluate the single-point energies of minima in the S<sub>0</sub> and S<sub>1</sub> states (Table S1). It is clear that the double-zeta 6-31G\* basis set presents very similar results as those of the triple-zeta basis sets, except for some small deviations for the S<sub>1</sub> C-isomer.

**Table S2.** Single point energies of S<sub>1</sub> minima and conical intersections in the MS-CASPT2 (16,13) calculations (unit: kcal/mol).

| structures         | environment                 | S <sub>0</sub> | S <sub>1</sub> |
|--------------------|-----------------------------|----------------|----------------|
| <b>C</b>           | MS-CASPT2(16,13)/6-31G*     | 0.0            | 52.8           |
| <b>E</b>           | MS-CASPT2(16,13)/6-31G*     | 16.4           | 62.5           |
| <b>Z</b>           | MS-CASPT2(16,13)/6-31G*     | 17.3           | 87.6           |
| <b>C</b>           | MS-CASPT2(16,13)/6-31G*/PCM | 0.0            | 50.6           |
| <b>E</b>           | MS-CASPT2(16,13)/6-31G*/PCM | 15.9           | 61.5           |
| <b>Z</b>           | MS-CASPT2(16,13)/6-31G*/PCM | 19.0           | 84.7           |
| <b>C</b>           | MS-CASPT2(16,13)/6-31G*/MM  | 0.0            | 70.8           |
| <b>E</b>           | MS-CASPT2(16,13)/6-31G*/MM  | 30.7           | 82.3           |
| <b>Z</b>           | MS-CASPT2(16,13)/6-31G*/MM  | 27.5           | 96.7           |
| <b>S1S0-EC-MIN</b> | MS-CASPT2(16,13)/6-31G*     | 67.3           | 73.5           |
| <b>S1S0-EZ-MIN</b> | MS-CASPT2(16,13)/6-31G*     | 72.0           | 72.8           |
| <b>S1S0-EC-MIN</b> | MS-CASPT2(16,13)/6-31G*/MM  | 82.2           | 83.7           |
| <b>S1S0-EZ-MIN</b> | MS-CASPT2(16,13)/6-31G*/MM  | 88.0           | 94.3           |

**Table S3.** MS-CASPT2/6-31G\* single point energies of Franck-Condon structures using different active spaces (unit: kcal/mol).

| structures  | active space for energies | S <sub>0</sub> | S <sub>1</sub> |
|-------------|---------------------------|----------------|----------------|
| <b>C-FC</b> | (12,10) $\pi$ -space      | 0.0            | 61.9           |
| <b>C-FC</b> | (16,13) n-space           | 0.0            | 60.1           |
| <b>E-FC</b> | (12,10) $\pi$ -space      | 15.6           | 105.5          |
| <b>E-FC</b> | (16,13) n-space           | 16.4           | 100.9          |
| <b>Z-FC</b> | (12,10) $\pi$ -space      | 18.7           | 105.2          |
| <b>Z-FC</b> | (16,13) n-space           | 17.3           | 105.9          |

**Table S4.** MS-CASPT2/6-31G\* single point energies of S<sub>1</sub> minimum structures using different active spaces (unit: kcal/mol).

| structures | active space for energies | S <sub>0</sub> | S <sub>1</sub> |
|------------|---------------------------|----------------|----------------|
| <b>C</b>   | (12,10) $\pi$ -space      | 0.0            | 55.3           |
| <b>C</b>   | (16,13) n-space           | 0.0            | 52.8           |
| <b>E</b>   | (12,10) $\pi$ -space      | 15.6           | 64.9           |
| <b>E</b>   | (16,13) n-space           | 16.4           | 62.5           |
| <b>Z</b>   | (12,10) $\pi$ -space      | 18.7           | 94.7           |
| <b>Z</b>   | (16,13) n-space           | 17.3           | 87.6           |

We have assessed the effects of active spaces with or without n orbital on the single-point energies at the Franck-Condon points and S<sub>1</sub> minima (see Tables S3-S4). The S<sub>1</sub> vertical excitation energies of n-space, i.e., (16,13) are consistent with those of  $\pi$ -space, i.e., (12,10), except for the E isomer (100.9 vs. 105.5 kcal/mol). For the S<sub>1</sub> minima, the relative energies of n-space are a little lower than the energies of  $\pi$ -space, e.g. 52.8 vs. 55.3 kcal/mol for the C isomer. Nevertheless, the S<sub>1</sub> electronic state properties of C, Z and E for n-space and  $\pi$ -space are same with each other, which can be assigned as a  $\pi \rightarrow \pi^*$  type.

**Table S5.** The oscillator strengths of the C, E, Z isomers from the ground state to the S<sub>1</sub> state.

|                                    | <b>C</b> | <b>E</b> | <b>Z</b> |
|------------------------------------|----------|----------|----------|
| <b>RASSCF(12,10)/6-31G*</b>        | 0.451    | 0.187    | 0.125    |
| <b>RASSCF(12,10)/6-31G*/PCM</b>    | 0.455    | 0.156    | 0.111    |
| <b>RASSCF(12,10)/6-31G*/MM</b>     | 0.438    | 0.186    | 0.407    |
| <b>MS-CASPT2(12,10)/6-31G*</b>     | 0.452    | 0.267    | 0.313    |
| <b>MS-CASPT2(12,10)/6-31G*/PCM</b> | 0.419    | 0.265    | 0.267    |
| <b>MS-CASPT2(12,10)/6-31G*/MM</b>  | 0.433    | 0.251    | 0.365    |
| <b>MS-CASPT2(16,13)/6-31G*</b>     | 0.376    | 0.292    | 0.178    |
| <b>MS-CASPT2(16,13)/6-31G*/PCM</b> | 0.370    | 0.264    | 0.158    |
| <b>MS-CASPT2(16,13)/6-31G*/MM</b>  | 0.369    | 0.231    | 0.283    |

#### 4. Cartesian Coordinates for Critical Structures

S0-C-MIN in Gas State

38

|   |             |             |             |
|---|-------------|-------------|-------------|
| C | 2.18390761  | 0.60307835  | 0.03957675  |
| C | 2.62209253  | -0.72366383 | 0.00520866  |
| C | 3.93468022  | -1.06832508 | -0.16381432 |
| C | 4.86410646  | -0.03204542 | -0.30648553 |
| C | 4.46254981  | 1.30650703  | -0.27123848 |
| C | 3.11749791  | 1.63699397  | -0.10040373 |
| C | 0.73522747  | 0.55240908  | 0.19261939  |
| C | 0.43198477  | -0.91238548 | 0.53579132  |
| H | 4.23266002  | -2.09986219 | -0.18586622 |
| H | 5.90312706  | -0.27238856 | -0.44074025 |
| H | 5.19441346  | 2.08671671  | -0.37420153 |
| H | 2.81619104  | 2.66578499  | -0.06567123 |
| O | 1.60816299  | -1.61463592 | 0.14672982  |
| C | 0.31096784  | -1.05083000 | 2.05978385  |
| H | -0.59057961 | -0.58481597 | 2.43992519  |
| H | 0.31518306  | -2.09343784 | 2.34678902  |
| H | 1.16075700  | -0.57216761 | 2.53124560  |
| C | -0.24673835 | 1.48667862  | 0.06584857  |
| C | 0.00316594  | 2.95491534  | -0.19713985 |
| H | -0.91608075 | 3.48665550  | -0.38940539 |
| H | 0.47974037  | 3.42667312  | 0.65574656  |
| C | -1.59750181 | 0.91728585  | 0.06485296  |
| O | -3.88992919 | 0.68690024  | 0.00138136  |
| C | -2.91741112 | 1.62440193  | 0.14377219  |
| C | -3.34328094 | -0.54982225 | -0.16034540 |
| O | -3.99813886 | -1.50364735 | -0.34724154 |
| O | -3.15844520 | 2.76013994  | 0.30516975  |
| C | -1.86133194 | -0.40023848 | -0.06795969 |
| C | -0.79230147 | -1.46391131 | -0.23911374 |
| C | -1.23571370 | -2.83870245 | 0.28704009  |
| H | -0.38789067 | -3.51378938 | 0.28987499  |
| H | -1.63712287 | -2.78958283 | 1.29163302  |
| H | -2.00376792 | -3.25670749 | -0.34891007 |
| C | -0.48825192 | -1.58604915 | -1.74673234 |
| H | -1.39046999 | -1.86061979 | -2.28274062 |
| H | -0.11606208 | -0.65681340 | -2.16246178 |
| H | 0.25433978  | -2.35364131 | -1.91653236 |
| H | 0.65386903  | 3.08312740  | -1.05540301 |

S1-C-MIN in Gas State

38

|   |            |             |             |
|---|------------|-------------|-------------|
| C | 2.13145994 | 0.61308615  | 0.05661277  |
| C | 2.58375170 | -0.74316079 | 0.11964802  |
| C | 3.91128365 | -1.11357471 | -0.14068353 |
| C | 4.77969473 | -0.09927467 | -0.45792621 |

|   |             |             |             |
|---|-------------|-------------|-------------|
| C | 4.38754730  | 1.23994962  | -0.53452047 |
| C | 3.05153557  | 1.62161228  | -0.28519902 |
| C | 0.74040837  | 0.55753341  | 0.31612211  |
| C | 0.39361890  | -0.87401795 | 0.67155684  |
| H | 4.20849046  | -2.14218730 | -0.09131784 |
| H | 5.80746302  | -0.34150829 | -0.65999528 |
| H | 5.11565337  | 1.98662224  | -0.78708479 |
| H | 2.75710724  | 2.64775206  | -0.35378969 |
| O | 1.65288973  | -1.57309830 | 0.42985988  |
| C | 0.13104667  | -1.04116134 | 2.17136327  |
| H | -0.82472398 | -0.61034144 | 2.43131217  |
| H | 0.13128783  | -2.08846482 | 2.43887921  |
| H | 0.90703031  | -0.54202581 | 2.74093409  |
| C | -0.27318035 | 1.51078473  | 0.14613346  |
| C | 0.00537970  | 2.98266877  | -0.00461460 |
| H | -0.90078154 | 3.55184236  | 0.13068361  |
| H | 0.73940527  | 3.32447285  | 0.71785452  |
| C | -1.58269851 | 0.96488417  | 0.02984120  |
| O | -3.82392699 | 0.66933320  | -0.08365087 |
| C | -2.87515966 | 1.63204292  | 0.04492308  |
| C | -3.24905124 | -0.58370644 | -0.18359309 |
| O | -3.93865222 | -1.54991128 | -0.32291751 |
| O | -3.16927391 | 2.78930750  | 0.14994838  |
| C | -1.83406961 | -0.40905809 | -0.10262336 |
| C | -0.75078794 | -1.44159651 | -0.23661514 |
| C | -1.19322038 | -2.84422751 | 0.21044117  |
| H | -0.34396233 | -3.52103437 | 0.23319852  |
| H | -1.66054088 | -2.83546229 | 1.18560512  |
| H | -1.92403547 | -3.23201964 | -0.48420262 |
| C | -0.26886281 | -1.53494341 | -1.70157599 |
| H | -1.09985446 | -1.84617094 | -2.32206997 |
| H | 0.07889702  | -0.57957152 | -2.07841776 |
| H | 0.52626669  | -2.26626102 | -1.81293714 |
| H | 0.38617081  | 3.20107116  | -1.00060050 |

S0-E-MIN in Gas State

38

|   |            |             |             |
|---|------------|-------------|-------------|
| C | 2.25057481 | 0.36913582  | -0.06137159 |
| C | 2.94600440 | -0.59178694 | 0.63680584  |
| C | 4.27208067 | -0.92853095 | 0.38439268  |
| C | 4.90107300 | -0.23404098 | -0.64299611 |
| C | 4.21573981 | 0.74952088  | -1.37874216 |
| C | 2.88874127 | 1.06029440  | -1.10045705 |
| C | 0.91014290 | 0.36808548  | 0.51884607  |
| C | 0.94152494 | -0.55267139 | 1.49471439  |
| H | 4.77381140 | -1.68464913 | 0.95800038  |
| H | 5.92635256 | -0.45321344 | -0.87955854 |
| H | 4.72776343 | 1.26790499  | -2.16906946 |

|   |             |             |             |
|---|-------------|-------------|-------------|
| H | 2.37248919  | 1.81134803  | -1.67035493 |
| O | 2.15525643  | -1.14813467 | 1.57987899  |
| C | -0.05789952 | -1.02006021 | 2.49604704  |
| H | -0.92376414 | -0.37348526 | 2.50946239  |
| H | -0.38564311 | -2.02992155 | 2.27051433  |
| H | 0.38774274  | -1.02753287 | 3.48420855  |
| C | -0.20061850 | 1.28582701  | 0.17914857  |
| C | 0.10761343  | 2.76724275  | 0.34668103  |
| H | -0.43905204 | 3.17915247  | 1.18677254  |
| H | 1.16323074  | 2.90374473  | 0.53467316  |
| C | -1.44347169 | 0.85042143  | -0.17910202 |
| O | -3.73210430 | 0.98483908  | 0.02489485  |
| C | -2.63106741 | 1.75742791  | -0.14188422 |
| C | -3.45491370 | -0.34735185 | -0.01871486 |
| O | -4.29439671 | -1.14033186 | 0.20297524  |
| O | -2.70695200 | 2.92938001  | -0.19829865 |
| C | -2.01622953 | -0.49707418 | -0.39695207 |
| C | -1.52594550 | -1.57979683 | -1.05701795 |
| C | -2.29578704 | -2.86935038 | -1.23318267 |
| H | -1.64181768 | -3.70439952 | -0.99823954 |
| H | -3.17615994 | -2.93433466 | -0.61819337 |
| H | -2.58882412 | -2.98203092 | -2.27375916 |
| C | -0.18082554 | -1.58651724 | -1.73810903 |
| H | -0.27277184 | -2.09267893 | -2.69398093 |
| H | 0.20669963  | -0.59550426 | -1.91709523 |
| H | 0.55006288  | -2.13477811 | -1.15286729 |
| H | -0.17275791 | 3.33922515  | -0.52612815 |

S1-E-MIN in Gas State

38

|   |             |             |             |
|---|-------------|-------------|-------------|
| C | 2.20565259  | 0.45786510  | 0.02004321  |
| C | 2.61914380  | -0.86073412 | 0.25823152  |
| C | 3.86352012  | -1.33427001 | -0.02965616 |
| C | 4.77303488  | -0.42380932 | -0.58397628 |
| C | 4.40889333  | 0.87861103  | -0.83485353 |
| C | 3.11631235  | 1.33965662  | -0.54637614 |
| C | 0.79476460  | 0.50276584  | 0.40253582  |
| C | 0.50317672  | -0.82934546 | 0.92764494  |
| H | 4.12850906  | -2.35646502 | 0.16438363  |
| H | 5.76922457  | -0.75419059 | -0.81578621 |
| H | 5.12382640  | 1.55825833  | -1.26184781 |
| H | 2.85544144  | 2.35692128  | -0.76226535 |
| O | 1.61608968  | -1.59500220 | 0.81025309  |
| C | -0.25749669 | -1.15046901 | 2.18126932  |
| H | -1.15737870 | -0.56307493 | 2.27321886  |
| H | -0.50992204 | -2.20221481 | 2.20883598  |
| H | 0.38243031  | -0.93564815 | 3.03333462  |
| C | -0.19698926 | 1.43889903  | 0.07788941  |



|   |             |             |             |
|---|-------------|-------------|-------------|
| C | 0.15314248  | 2.87512907  | -0.21466541 |
| H | -0.68990556 | 3.52218898  | -0.02867639 |
| H | 0.98727656  | 3.20486135  | 0.39126499  |
| C | -1.54607974 | 0.97368062  | -0.04993626 |
| O | -3.81248250 | 0.88196800  | 0.26972577  |
| C | -2.75570322 | 1.74966622  | 0.25067926  |
| C | -3.42028865 | -0.38632333 | 0.00658377  |
| O | -4.17758587 | -1.28667392 | 0.00083925  |
| O | -2.91007242 | 2.89618250  | 0.48282828  |
| C | -1.95214757 | -0.36168829 | -0.29095131 |
| C | -1.18951110 | -1.48623533 | -0.72425133 |
| C | -1.72427994 | -2.88829763 | -0.53258647 |
| H | -0.89395221 | -3.58823377 | -0.53131165 |
| H | -2.27085480 | -3.00681539 | 0.39212711  |
| H | -2.39287092 | -3.17496503 | -1.34060022 |
| C | -0.25135993 | -1.34426469 | -1.90644549 |
| H | -0.77966694 | -1.62799454 | -2.81491731 |
| H | 0.11298480  | -0.33698179 | -2.04748398 |
| H | 0.60087945  | -2.00822995 | -1.81157208 |
| H | 0.43014696  | 2.98064733  | -1.26158841 |

#### S0-Z-MIN in Gas State

38

|   |             |             |             |
|---|-------------|-------------|-------------|
| C | 2.63655486  | 0.69975615  | 0.38756837  |
| C | 3.54801702  | 0.27159557  | 1.34235656  |
| C | 4.77106136  | 0.90157788  | 1.57492186  |
| C | 5.05641085  | 1.99687483  | 0.81060046  |
| C | 4.14235679  | 2.46843423  | -0.16230355 |
| C | 2.94926484  | 1.84431110  | -0.37572397 |
| C | 1.50932327  | -0.21344958 | 0.50905221  |
| C | 1.84820365  | -1.09664397 | 1.50449996  |
| H | 5.44691809  | 0.53610255  | 2.32597491  |
| H | 5.98644389  | 2.51732319  | 0.95259496  |
| H | 4.39701369  | 3.34179378  | -0.73569139 |
| H | 2.26117275  | 2.23112237  | -1.10657524 |
| O | 3.07234116  | -0.81667636 | 2.00224413  |
| C | 1.15713540  | -2.26744903 | 2.11459535  |
| H | 1.82044339  | -3.12508847 | 2.13598866  |
| H | 0.85664831  | -2.04064139 | 3.13077901  |
| H | 0.27060429  | -2.53052934 | 1.55247410  |
| C | 0.30418699  | -0.26144619 | -0.35127679 |
| C | 0.58926446  | -0.43370321 | -1.82759746 |
| H | -0.26130191 | -0.19161746 | -2.44734962 |
| H | 1.41474742  | 0.20497494  | -2.10993458 |
| C | -0.95601974 | -0.13697275 | 0.13224172  |
| O | -2.41761628 | 1.13858747  | 1.35894351  |
| C | -1.27628735 | 0.41256133  | 1.49491386  |
| C | -3.01923094 | 0.97552102  | 0.14973781  |

|   |             |             |             |
|---|-------------|-------------|-------------|
| O | -3.97526986 | 1.59307658  | -0.14048453 |
| O | -0.73032542 | 0.31547067  | 2.52558976  |
| C | -2.25437349 | -0.08035686 | -0.58512536 |
| C | -2.79997127 | -0.93533456 | -1.47966535 |
| C | -4.18395980 | -0.76395142 | -2.06241762 |
| H | -4.82240240 | -1.57843656 | -1.73226003 |
| H | -4.64651414 | 0.17131574  | -1.79852132 |
| H | -4.12252930 | -0.82846141 | -3.14492671 |
| C | -2.09863040 | -2.19011348 | -1.94172397 |
| H | -1.78115927 | -2.09962934 | -2.97584567 |
| H | -1.23835402 | -2.44052050 | -1.33885052 |
| H | -2.79524990 | -3.02075644 | -1.89509574 |
| H | 0.89698512  | -1.45324716 | -2.03176668 |

S1-Z-MIN in Gas State

38

|   |             |             |             |
|---|-------------|-------------|-------------|
| C | 2.53077695  | 0.57601619  | 0.38773885  |
| C | 3.39844369  | 0.38056133  | 1.46025103  |
| C | 4.44601966  | 1.22252719  | 1.78343025  |
| C | 4.58981405  | 2.31788983  | 0.96165817  |
| C | 3.72696437  | 2.56576428  | -0.13095389 |
| C | 2.70142594  | 1.71798829  | -0.42676013 |
| C | 1.61256580  | -0.50920231 | 0.40140790  |
| C | 2.01645496  | -1.27993665 | 1.53531866  |
| H | 5.09115731  | 1.03956041  | 2.62085268  |
| H | 5.38263490  | 3.01546693  | 1.16069403  |
| H | 3.88583465  | 3.44691449  | -0.72393357 |
| H | 2.03017954  | 1.90596785  | -1.24278269 |
| O | 3.04645417  | -0.76158773 | 2.12929717  |
| C | 1.39412895  | -2.48980626 | 2.11408410  |
| H | 2.12731464  | -3.08178717 | 2.64509966  |
| H | 0.62682596  | -2.15991100 | 2.80685508  |
| H | 0.92048872  | -3.06736922 | 1.33356997  |
| C | 0.43749160  | -0.78409104 | -0.43747097 |
| C | 0.74130868  | -1.05242163 | -1.90053078 |
| H | -0.00078148 | -0.59215009 | -2.53956350 |
| H | 1.70753502  | -0.64129821 | -2.18728625 |
| C | -0.77329433 | -0.19231600 | 0.03818685  |
| O | -2.00203581 | 1.11920073  | 1.45085861  |
| C | -0.81747737 | 0.44759178  | 1.30625082  |
| C | -2.77299849 | 0.95946585  | 0.35039208  |
| O | -3.80214728 | 1.53181406  | 0.25138419  |
| O | -0.01133284 | 0.48954329  | 2.20720252  |
| C | -2.09826694 | -0.03143848 | -0.54643387 |
| C | -2.78862825 | -0.71778596 | -1.51797357 |
| C | -4.16587552 | -0.32665167 | -2.00793750 |
| H | -4.93114187 | -0.95236591 | -1.55186317 |
| H | -4.41491213 | 0.70069995  | -1.80478359 |

|   |             |             |             |
|---|-------------|-------------|-------------|
| H | -4.22360029 | -0.49212795 | -3.08158445 |
| C | -2.28732554 | -2.01067929 | -2.11498904 |
| H | -1.95592136 | -1.89323637 | -3.14423082 |
| H | -1.48155125 | -2.44613140 | -1.54213804 |
| H | -3.10425535 | -2.72826591 | -2.13215842 |
| H | 0.77362865  | -2.11103829 | -2.14921729 |

S0-C-MIN in QM

38

|   |              |              |              |
|---|--------------|--------------|--------------|
| C | 30.295636180 | 28.185010029 | 27.898294006 |
| C | 30.711848210 | 26.851792930 | 27.846631003 |
| C | 31.922563295 | 26.471174907 | 27.339770968 |
| C | 32.770638359 | 27.476048979 | 26.861239935 |
| C | 32.391314333 | 28.820143073 | 26.904236936 |
| C | 31.147497243 | 29.186742101 | 27.420450972 |
| C | 28.962631086 | 28.176228026 | 28.490419048 |
| C | 28.801058073 | 26.754537925 | 29.050553092 |
| H | 32.208792316 | 25.436797832 | 27.323289965 |
| H | 33.733008428 | 27.206667956 | 26.466526905 |
| H | 33.063064380 | 29.577938128 | 26.544339911 |
| H | 30.866483222 | 30.220052174 | 27.467150975 |
| O | 29.788777146 | 25.997044872 | 28.358791038 |
| C | 29.190495100 | 26.747464926 | 30.534027197 |
| H | 28.476134051 | 27.286175965 | 31.145704243 |
| H | 29.270204106 | 25.733275853 | 30.898782222 |
| H | 30.158350171 | 27.217546957 | 30.649376206 |
| C | 27.974436013 | 29.107694096 | 28.576947058 |
| C | 28.066195020 | 30.521313195 | 28.054535017 |
| H | 27.088018951 | 30.957274226 | 27.919255008 |
| H | 28.608393056 | 31.164625245 | 28.736296065 |
| C | 26.715334924 | 28.575263057 | 29.102760095 |
| O | 24.562480767 | 28.410045046 | 29.901489153 |
| C | 25.518583838 | 29.326078111 | 29.600283130 |
| C | 25.017224802 | 27.147353955 | 29.661707136 |
| O | 24.340636753 | 26.202502886 | 29.810502147 |
| O | 25.362602827 | 30.478058194 | 29.749769141 |
| C | 26.431485904 | 27.260172962 | 29.194454103 |
| C | 27.393736972 | 26.161262881 | 28.775436073 |
| C | 27.158005954 | 24.853877786 | 29.547603127 |
| H | 27.965922012 | 24.161652740 | 29.346138110 |
| H | 27.099927952 | 25.008947798 | 30.617233202 |
| H | 26.230904888 | 24.394348757 | 29.237329102 |
| C | 27.194479957 | 25.892383862 | 27.269836961 |
| H | 26.170628884 | 25.589304842 | 27.080763946 |
| H | 27.406812973 | 26.769784924 | 26.670355922 |
| H | 27.849540006 | 25.096407805 | 26.943362941 |
| H | 28.576703055 | 30.536222198 | 27.100670949 |

## S1-C-MIN in QM

38

|   |              |              |              |
|---|--------------|--------------|--------------|
| C | 30.461520950 | 28.128512568 | 28.057856949 |
| C | 30.899993985 | 26.761299641 | 28.089978267 |
| C | 32.112802897 | 26.307760125 | 27.546889340 |
| C | 32.928956138 | 27.256968027 | 26.932950972 |
| C | 32.519998937 | 28.610474543 | 26.868894081 |
| C | 31.302244123 | 29.059298143 | 27.417560050 |
| C | 29.198594936 | 28.149065934 | 28.675749885 |
| C | 28.954345921 | 26.758308165 | 29.248685510 |
| H | 32.371084729 | 25.268373949 | 27.602318328 |
| H | 33.867653685 | 26.964247165 | 26.503748143 |
| H | 33.160293677 | 29.323979193 | 26.385750268 |
| H | 31.036127758 | 30.092677120 | 27.341591634 |
| O | 30.027746638 | 25.981190483 | 28.675049397 |
| C | 29.194466909 | 26.712288663 | 30.761700612 |
| H | 28.413919137 | 27.239491107 | 31.292937980 |
| H | 29.226260719 | 25.688403665 | 31.105094006 |
| H | 30.145941684 | 27.173544398 | 30.991298344 |
| C | 28.208726954 | 29.113104700 | 28.732258512 |
| C | 28.410559655 | 30.534854306 | 28.287736330 |
| H | 27.617783353 | 31.167187908 | 28.652879284 |
| H | 29.359680380 | 30.923926994 | 28.629243248 |
| C | 26.923453515 | 28.638063040 | 29.137245084 |
| O | 24.762412759 | 28.478920629 | 29.807323379 |
| C | 25.732105688 | 29.391057199 | 29.523033819 |
| C | 25.216932459 | 27.197875407 | 29.632394399 |
| O | 24.507129965 | 26.265346124 | 29.810885975 |
| O | 25.534086868 | 30.556232210 | 29.615954127 |
| C | 26.607101349 | 27.285623038 | 29.216252157 |
| C | 27.558789002 | 26.179804294 | 28.842032321 |
| C | 27.249631693 | 24.852286714 | 29.554798933 |
| H | 28.054847306 | 24.144443970 | 29.386941496 |
| H | 27.112501119 | 24.975760632 | 30.620321618 |
| H | 26.336000055 | 24.428636569 | 29.164347934 |
| C | 27.505383190 | 25.933451213 | 27.319570912 |
| H | 26.505398520 | 25.625923008 | 27.038754634 |
| H | 27.751574978 | 26.824622928 | 26.755484507 |
| H | 28.192124886 | 25.143165367 | 27.037439697 |
| H | 28.404189747 | 30.580442185 | 27.201700332 |

## S0-E-MIN in QM

38

|   |              |              |              |
|---|--------------|--------------|--------------|
| C | 30.250198820 | 28.680329348 | 28.421044604 |
| C | 31.159893718 | 27.675806972 | 28.659180266 |
| C | 32.387175617 | 27.568372899 | 28.012197541 |
| C | 32.680523755 | 28.554526861 | 27.076899979 |

|   |              |              |              |
|---|--------------|--------------|--------------|
| C | 31.770717804 | 29.593932521 | 26.811261927 |
| C | 30.551104033 | 29.668224546 | 27.474607797 |
| C | 29.106811835 | 28.373075268 | 29.275753170 |
| C | 29.447635819 | 27.260197564 | 29.944106157 |
| H | 33.061293996 | 26.761416235 | 28.227393491 |
| H | 33.614657164 | 28.520061837 | 26.546356701 |
| H | 32.019926564 | 30.339314814 | 26.078761814 |
| H | 29.860583683 | 30.462864081 | 27.263768161 |
| O | 30.678709194 | 26.822534037 | 29.588701895 |
| C | 28.761848029 | 26.440700145 | 30.981498987 |
| H | 27.903384670 | 26.964944287 | 31.375382563 |
| H | 28.428056959 | 25.495764630 | 30.566441891 |
| H | 29.442849379 | 26.222871548 | 31.794993069 |
| C | 27.871064524 | 29.175490967 | 29.418773651 |
| C | 28.076144156 | 30.625009059 | 29.834739026 |
| H | 27.774036891 | 30.772696037 | 30.865338008 |
| H | 29.121484232 | 30.885595262 | 29.752195853 |
| C | 26.621908443 | 28.647677979 | 29.258345821 |
| O | 24.439313551 | 28.422799652 | 29.951758261 |
| C | 25.402584237 | 29.354136105 | 29.758582165 |
| C | 24.809279569 | 27.180213407 | 29.541023025 |
| O | 24.099290889 | 26.259101663 | 29.713810208 |
| O | 25.213889298 | 30.488390252 | 30.004699079 |
| C | 26.138874026 | 27.302726153 | 28.869704528 |
| C | 26.563050269 | 26.442363402 | 27.904877177 |
| C | 25.911228313 | 25.104787872 | 27.633380943 |
| H | 26.688549708 | 24.352407152 | 27.532792423 |
| H | 25.224085739 | 24.794733085 | 28.400882845 |
| H | 25.381080003 | 25.137884189 | 26.685297845 |
| C | 27.693147089 | 26.759205623 | 26.958267594 |
| H | 27.409779430 | 26.442608422 | 25.959532602 |
| H | 27.931131253 | 27.810747440 | 26.921940206 |
| H | 28.593483048 | 26.215339298 | 27.224033781 |
| H | 27.494277522 | 31.305578749 | 29.230895481 |

S1-E-MIN in QM

38

|   |              |              |              |
|---|--------------|--------------|--------------|
| C | 30.200374443 | 28.862432427 | 28.604826957 |
| C | 30.788627114 | 27.606068364 | 28.522180922 |
| C | 31.957158342 | 27.326959666 | 27.871186023 |
| C | 32.589937357 | 28.400052687 | 27.232407725 |
| C | 32.017222055 | 29.671546155 | 27.258552738 |
| C | 30.820617429 | 29.919293084 | 27.937691596 |
| C | 28.926048343 | 28.657851576 | 29.304612237 |
| C | 28.899694517 | 27.232079683 | 29.613485801 |
| H | 32.353767615 | 26.329988427 | 27.843735419 |
| H | 33.512443573 | 28.236305624 | 26.707007765 |
| H | 32.495468121 | 30.478400021 | 26.738280833 |

|   |              |              |              |
|---|--------------|--------------|--------------|
| H | 30.402898551 | 30.905542562 | 27.931823348 |
| O | 30.022348876 | 26.673105215 | 29.163653690 |
| C | 28.407719005 | 26.550295124 | 30.855730007 |
| H | 27.494438339 | 26.982761743 | 31.223612591 |
| H | 28.269112286 | 25.495951768 | 30.667252099 |
| H | 29.174013869 | 26.654225610 | 31.615940804 |
| C | 27.811112271 | 29.454421570 | 29.373165610 |
| C | 27.870607992 | 30.950275275 | 29.325520766 |
| H | 27.267493452 | 31.349549426 | 30.130103933 |
| H | 28.877834898 | 31.324400504 | 29.416523880 |
| C | 26.537775208 | 28.793073900 | 29.444788756 |
| O | 24.436920537 | 28.262178645 | 30.142929623 |
| C | 25.361673782 | 29.279893759 | 30.132805076 |
| C | 24.914644803 | 27.163567718 | 29.529771039 |
| O | 24.294761123 | 26.166866831 | 29.448006894 |
| O | 25.120258385 | 30.314993150 | 30.654950093 |
| C | 26.280567744 | 27.492946551 | 28.976482697 |
| C | 27.063146911 | 26.612234987 | 28.183054163 |
| C | 26.711955503 | 25.138443810 | 28.119893133 |
| H | 27.585636016 | 24.579144665 | 27.797022969 |
| H | 26.390499549 | 24.740384909 | 29.071872542 |
| H | 25.916794433 | 24.938016286 | 27.406532726 |
| C | 27.705706148 | 27.118922923 | 26.901467137 |
| H | 27.031537661 | 26.938492537 | 26.067482777 |
| H | 27.923168872 | 28.177006170 | 26.911032529 |
| H | 28.624007082 | 26.582880996 | 26.686334069 |
| H | 27.427150028 | 31.304995067 | 28.401074566 |

S0-Z-MIN in QM

38

|   |              |              |              |
|---|--------------|--------------|--------------|
| C | 30.637085207 | 28.528105051 | 28.643878063 |
| C | 31.777678289 | 28.215239031 | 29.345883110 |
| C | 33.031090379 | 28.736303066 | 29.062725089 |
| C | 33.099288383 | 29.654520136 | 28.024151015 |
| C | 31.939319301 | 30.035262161 | 27.315760963 |
| C | 30.709255210 | 29.480415122 | 27.613992989 |
| C | 29.575057129 | 27.740210997 | 29.275578107 |
| C | 30.171787172 | 27.072513946 | 30.276343177 |
| H | 33.896368440 | 28.447366049 | 29.625853133 |
| H | 34.046202449 | 30.085554167 | 27.759427000 |
| H | 32.018378302 | 30.771374216 | 26.537483912 |
| H | 29.831387149 | 29.785104142 | 27.077182951 |
| O | 31.489932265 | 27.335655969 | 30.334862184 |
| C | 29.684310138 | 26.101191881 | 31.292763251 |
| H | 28.690505067 | 25.751796855 | 31.052351232 |
| H | 30.357793186 | 25.253850817 | 31.343091257 |
| H | 29.649583135 | 26.574614914 | 32.266642322 |
| C | 28.200808028 | 27.562824984 | 28.772654072 |

|   |              |              |              |
|---|--------------|--------------|--------------|
| C | 28.113877023 | 27.210253958 | 27.303699966 |
| H | 28.790157070 | 27.834353006 | 26.739651926 |
| H | 28.429541047 | 26.184570884 | 27.145094956 |
| C | 27.077608949 | 27.697941991 | 29.541023126 |
| O | 25.823188856 | 29.019458086 | 30.940611228 |
| C | 27.052639948 | 28.453171050 | 30.834522218 |
| C | 24.963202795 | 28.602193057 | 29.972673156 |
| O | 23.881070718 | 29.053741088 | 29.892219153 |
| O | 27.871469006 | 28.616728058 | 31.657964277 |
| C | 25.654469845 | 27.545416984 | 29.177555097 |
| C | 25.004006801 | 26.553592909 | 28.505324050 |
| C | 23.521920690 | 26.572483912 | 28.213844029 |
| H | 23.045545658 | 25.697315851 | 28.641388062 |
| H | 23.022757655 | 27.452489977 | 28.579209058 |
| H | 23.374171683 | 26.509759908 | 27.138530951 |
| C | 25.703971848 | 25.314033822 | 28.005424014 |
| H | 25.806013858 | 25.327040825 | 26.924343935 |
| H | 26.683605922 | 25.178746812 | 28.439665044 |
| H | 25.105358807 | 24.444356758 | 28.251334031 |
| H | 27.119678953 | 27.338111966 | 26.904145938 |

S1-Z-MIN in QM

38

|   |              |              |              |
|---|--------------|--------------|--------------|
| C | 30.674668328 | 28.422355312 | 28.689996892 |
| C | 31.890536397 | 28.311971499 | 29.354272157 |
| C | 33.021634521 | 29.001773845 | 29.019860282 |
| C | 32.893389542 | 29.898024921 | 27.948104635 |
| C | 31.671811819 | 30.071556296 | 27.270438287 |
| C | 30.550214380 | 29.337175948 | 27.621055727 |
| C | 29.791258865 | 27.498947220 | 29.290383391 |
| C | 30.563663128 | 26.923183719 | 30.340161709 |
| H | 33.946262473 | 28.875850790 | 29.546770012 |
| H | 33.750499673 | 30.464301760 | 27.640186930 |
| H | 31.621157840 | 30.783098889 | 26.469615565 |
| H | 29.611531718 | 29.453783658 | 27.115330598 |
| O | 31.781593301 | 27.399132701 | 30.373774392 |
| C | 30.153369956 | 25.960961254 | 31.379173641 |
| H | 29.189872835 | 25.545813706 | 31.128843322 |
| H | 30.897064449 | 25.180522762 | 31.483699695 |
| H | 30.070529878 | 26.498833028 | 32.317600551 |
| C | 28.391798274 | 27.161559591 | 28.966129736 |
| C | 28.230080468 | 26.440410764 | 27.641281374 |
| H | 29.089148412 | 26.616386642 | 26.999085364 |
| H | 28.133822523 | 25.360722687 | 27.735910686 |
| C | 27.401392140 | 27.931385677 | 29.644692928 |
| O | 26.742721487 | 29.528143258 | 31.148652765 |
| C | 27.801998654 | 28.785072042 | 30.710965722 |
| C | 25.626447354 | 29.201321860 | 30.457546744 |

|   |              |              |              |
|---|--------------|--------------|--------------|
| O | 24.624169700 | 29.801375141 | 30.629079740 |
| O | 28.877910533 | 28.928555352 | 31.240803490 |
| C | 25.946211703 | 28.028270966 | 29.575544088 |
| C | 24.967716471 | 27.204465050 | 29.080020586 |
| C | 23.486675967 | 27.501511369 | 29.138932545 |
| H | 23.005614583 | 26.838407360 | 29.854704646 |
| H | 23.256253841 | 28.516995668 | 29.407309423 |
| H | 23.037378786 | 27.282992376 | 28.172616063 |
| C | 25.260061114 | 25.842601618 | 28.498252877 |
| H | 25.287419683 | 25.854183646 | 27.411372560 |
| H | 26.188857495 | 25.428662896 | 28.860555646 |
| H | 24.465266012 | 25.159664738 | 28.777011857 |
| H | 27.360623748 | 26.798831167 | 27.106527131 |

S1S0-EC-MIN in QM

38

|   |             |             |             |
|---|-------------|-------------|-------------|
| C | 29.83323097 | 28.41336384 | 28.72291635 |
| C | 30.53533433 | 27.26270481 | 29.05089070 |
| C | 31.75098365 | 26.93950464 | 28.47444103 |
| C | 32.25773565 | 27.84565642 | 27.55862203 |
| C | 31.56716962 | 29.01924413 | 27.21125386 |
| C | 30.34841456 | 29.30133215 | 27.77136676 |
| C | 28.62028703 | 28.39864762 | 29.52223461 |
| C | 28.72828042 | 27.20296162 | 30.29673755 |
| H | 32.27074597 | 26.03839906 | 28.73622662 |
| H | 33.20738871 | 27.64541914 | 27.09775612 |
| H | 32.00056464 | 29.69581969 | 26.49931119 |
| H | 29.80795469 | 30.18500536 | 27.49850570 |
| O | 29.88679959 | 26.52577257 | 29.95407311 |
| C | 28.18149837 | 26.96480195 | 31.65536548 |
| H | 27.09842788 | 26.97784405 | 31.63438125 |
| H | 28.52742329 | 26.01438974 | 32.03722399 |
| H | 28.49504208 | 27.75403380 | 32.32903660 |
| C | 27.65062389 | 29.46892025 | 29.67444956 |
| C | 28.03150830 | 30.93042158 | 29.56484139 |
| H | 27.32538227 | 31.52188542 | 30.13116260 |
| H | 29.02118859 | 31.12402651 | 29.96095026 |
| C | 26.36194783 | 29.00373233 | 29.72672075 |
| O | 24.15449582 | 28.68252828 | 30.17645993 |
| C | 25.07267082 | 29.65488112 | 30.11843706 |
| C | 24.69482256 | 27.43310714 | 29.79785952 |
| O | 23.98612983 | 26.47550925 | 29.78522442 |
| O | 24.84778746 | 30.78800780 | 30.36421911 |
| C | 26.04088381 | 27.67420187 | 29.46756478 |
| C | 27.07436699 | 26.81874841 | 28.92223952 |
| C | 27.02789252 | 25.35598454 | 29.30508178 |
| H | 27.88763334 | 24.80696261 | 28.94827784 |
| H | 26.88393302 | 25.19547688 | 30.35966572 |



|   |             |             |             |
|---|-------------|-------------|-------------|
| H | 26.13822857 | 24.97647451 | 28.80868802 |
| C | 27.43403742 | 26.98601465 | 27.45561550 |
| H | 26.66821003 | 26.44364783 | 26.90843150 |
| H | 27.41135701 | 28.01609556 | 27.13771303 |
| H | 28.39277387 | 26.54498583 | 27.21080827 |
| H | 28.00611931 | 31.30128851 | 28.54289134 |

S1S0-EZ-MIN in QM

38

|   |             |             |             |
|---|-------------|-------------|-------------|
| C | 30.57828029 | 28.56633535 | 28.66870695 |
| C | 31.38596075 | 27.77598183 | 29.46520995 |
| C | 32.73194463 | 27.61736322 | 29.40000459 |
| C | 33.35345305 | 28.35293770 | 28.40777920 |
| C | 32.59816471 | 29.16959754 | 27.56041071 |
| C | 31.22405767 | 29.27710146 | 27.66383468 |
| C | 29.19992277 | 28.31450355 | 29.13191282 |
| C | 29.35279841 | 27.35672514 | 30.23914751 |
| H | 33.26636755 | 26.97329937 | 30.06834572 |
| H | 34.41759177 | 28.29551958 | 28.28823413 |
| H | 33.10628088 | 29.73426858 | 26.80223411 |
| H | 30.69166365 | 29.89521134 | 26.97147625 |
| O | 30.55157040 | 27.11293900 | 30.41511699 |
| C | 28.42121963 | 26.76268581 | 31.20784655 |
| H | 27.95396678 | 27.60557577 | 31.71814086 |
| H | 27.64729267 | 26.23076809 | 30.68306927 |
| H | 28.97543787 | 26.13063452 | 31.88499279 |
| C | 28.00242357 | 28.90076754 | 28.88397272 |
| C | 27.99014954 | 30.16522168 | 28.08542920 |
| H | 27.50846925 | 30.87303924 | 28.75041365 |
| H | 28.94735286 | 30.54557669 | 27.77096602 |
| C | 26.74526368 | 28.42679809 | 29.38373320 |
| O | 25.08804081 | 28.27247207 | 30.86682681 |
| C | 26.36132814 | 28.83716473 | 30.57503112 |
| C | 24.68615123 | 27.51249772 | 29.86085950 |
| O | 23.62885333 | 26.96526437 | 29.86674709 |
| O | 26.92699055 | 29.48400345 | 31.48713040 |
| C | 25.76444260 | 27.48966629 | 28.79515423 |
| C | 25.72462821 | 26.72068676 | 27.68728116 |
| C | 24.63051935 | 25.73000498 | 27.35069395 |
| H | 25.03630479 | 24.71844756 | 27.32395070 |
| H | 23.81671847 | 25.75248493 | 28.05315908 |
| H | 24.23240926 | 25.92520910 | 26.35650864 |
| C | 26.80902455 | 26.74905189 | 26.63271091 |
| H | 26.38664696 | 26.97350009 | 25.65526383 |
| H | 27.58400940 | 27.48334052 | 26.81384113 |
| H | 27.29836129 | 25.77996505 | 26.54041985 |
| H | 27.32478356 | 30.02587551 | 27.24409521 |
